# Supplementary material
Source: Research Square preprint supplement (doi:10.21203/rs.3.rs-9113085/v1)
Supplement: Supplementary file 1 [file questionnaire.pdf › Replication_Package_HSSC/3_Documentation/questionnaire.pdf]

## 西北农村家户调查

本次调查为无记名的调查、登记。该问卷尽可能覆盖所在社区的所有家庭，入户调查时最好由户主完成，如果户主外出务工或不能完成，那么应当由一位对本户组成情况、基本信息、经济状况都非常了解的成年的家庭成员完成。每一户完成一套问卷。

### 1. 家庭成员基本情况

|     |                     |   |
|-----|---------------------|---|
| 101 | 家庭总人口数              | 人 |
| 102 | 家庭中有劳动收入的人口数        | 人 |
| 103 | 家庭中正在生病、残疾而无法劳动的人口数 | 人 |
| 104 | 家庭中 60 周岁以上老年人口数    | 人 |
| 105 | 家庭中 18 周岁以下需赡养子女人口数 | 人 |

|     |      |    |    |    |      |    |
|-----|------|----|----|----|------|----|
|     | 家庭角色 | 性别 | 年龄 | 民族 | 教育水平 | 职业 |
| 106 | 户主   |    |    |    |      |    |
| 107 | 配偶   |    |    |    |      |    |

|     |                |   |
|-----|----------------|---|
| 108 | 该家庭中共养育子女几人？   | 人 |
| 109 | 其中男孩几人？        | 人 |
| 110 | 第一胎是否是男孩？（是/否） |   |

|     |               |   |
|-----|---------------|---|
| 111 | 户主有几个兄弟姐妹？（人） | 人 |
| 112 | 是否与婆家同住？（是/否） |   |
| 113 | 是否与娘家同住？（是/否） |   |

\* 年龄请按照户口登记出生年月核算为截止调查工作时的周岁。

\* 教育学历按照从未就学、小学毕业、初中毕业、高中或中专毕业、高中以上。

## 2. 农业生产及收入

|     |                  | 2017 | 2018 |
|-----|------------------|------|------|
| 201 | 你家有多少农地          |      |      |
|     | 高质量农地（如就近水源地、菜地） |      |      |
|     | 普通质量农地           |      |      |
|     | 果园、林地            |      |      |
|     | 荒地、弃耕地           |      |      |

|     |                                 |  |  |
|-----|---------------------------------|--|--|
| 202 | 你家近年是否从事家庭农业（如种植粮食、蔬菜、水果、畜牧养殖等） |  |  |
| 203 | 家庭中从事农业生产的人数                    |  |  |
| 204 | 当年种了多少亩农田                       |  |  |
| 205 | 种植主要粮食收入多少钱                     |  |  |
|     | 种植主要粮食租地、种子、肥料、农药、农具、雇工等花费多少成本  |  |  |
| 206 | 菜地或塑料大棚种植蔬菜收入多少钱                |  |  |
|     | 种植蔬菜租地、种子、肥料、农药、农具、雇工等花费多少成本    |  |  |
| 207 | 果园种植水果收入多少钱                     |  |  |
|     | 果园租地、种子、肥料、农药、农具、雇工等花费多少成本      |  |  |
| 208 | 养殖及肉蛋类收入多少钱                     |  |  |
|     | 养殖经营各项成本多少钱                     |  |  |
| 209 | 其他农业类（如渔业、林业、中药材采摘）收入多少钱        |  |  |
|     | 其他农业类（如渔业、林业、中药材采摘）经营各项成本多少钱    |  |  |

|     |                    |  |  |
|-----|--------------------|--|--|
| 210 | 近年农业生产是否受灾（如旱灾、冰雹） |  |  |
| 211 | 是否加入农业保险           |  |  |
| 212 | 是否接收政府灾害补贴         |  |  |

|     |             |  |  |
|-----|-------------|--|--|
| 213 | 是否有拖拉机      |  |  |
|     | 是否有机动三轮车或货车 |  |  |
|     | 是否有汽车       |  |  |

|     |                                   |  |  |
|-----|-----------------------------------|--|--|
| 214 | 是否加入农业生产相关组织（如农村合作社、农民互助小组、技术小组等） |  |  |
| 215 | 是否有农业技术信息员                        |  |  |
| 216 | 是否接受农业技术信息员咨询或帮助                  |  |  |
| 217 | 是否参加农业技术相关培训                      |  |  |
| 218 | 是否收看农业普及电视节目                      |  |  |
| 219 | 是否参加精准扶贫项目等                       |  |  |
| 220 | 是否有农业生产相关贷款                       |  |  |

### 3. 家庭资产及租赁服务收入

|     |                                        | 2017 | 2018 |
|-----|----------------------------------------|------|------|
| 301 | 你家的住房/公寓有房产证                           |      |      |
|     | 如是，你家的房产是 (1) 自己买的、自己建的；(2) 祖辈延续使用没有花钱 |      |      |
|     | 如是，你家的房产是 (1) 土木结构；(2) 砖木结构            |      |      |
|     | 如不是，租金每年多少钱                            |      |      |
| 302 | 家中空余房屋是否出租？如是，租金每年收入多少钱                |      |      |
| 303 | 你家是否有其他宅基地                             |      |      |

|     |             |  |  |
|-----|-------------|--|--|
| 304 | 家中是否有存款     |  |  |
| 305 | 家中是否有贷款     |  |  |
| 306 | 家中成员是否有养老保险 |  |  |

|     |            |  |  |
|-----|------------|--|--|
| 308 | 家中牲畜头数（牛）  |  |  |
|     | 家中牲畜头数（羊）  |  |  |
|     | 家中牲畜头数（其他） |  |  |

|     |               |  |  |
|-----|---------------|--|--|
| 309 | 你家是否有电视机      |  |  |
| 310 | 你家是否有电脑       |  |  |
| 311 | 你家是否有冰箱       |  |  |
| 312 | 你家是否有洗衣机      |  |  |
| 313 | 你家是否有摩托车      |  |  |
| 314 | 你家是否使用互联网     |  |  |
| 315 | 你是否有智能手机（可上网） |  |  |

#### 4. 家庭手工业、小商业及收入

|     |                                                                                                                          | 2014 | 2015 |
|-----|--------------------------------------------------------------------------------------------------------------------------|------|------|
| 401 | 你家近几年是否从事小手工业或小商业，如在本地就近（1）木工、泥瓦匠、建筑工，（2）鞋匠、裁缝、理发、电器修理，（3）饭店、商店超市、家庭旅馆、家庭诊所或受上述单位雇佣提供劳务，（4）家政服务/保姆，（5）民族手工技艺，（6）司机，（7）其他 | 填编号  | 填编号  |
| 402 | 从事小手工业或小商业的人数                                                                                                            |      |      |
| 403 | 从事小手工业或小商业的每年收入                                                                                                          |      |      |
|     | 从事小手工业或小商业的每年投入成本                                                                                                        |      |      |
| 404 | 据你所知，本村或最近的邻村从事小手工业或小商业致富的农户大约有多少家                                                                                       |      |      |
| 405 | 是否获得扶持小手工业或小商业的无息贷款或低息贷款                                                                                                 |      |      |
| 406 | 是否获得扶持小手工业或小商业的政府项目资金（如补贴、扶贫款等）                                                                                          |      |      |
| 407 | 是否参加扶持上述小手工业、小商业相关的宣讲、培训、讲座等活动                                                                                           |      |      |
| 408 | 是否参加扶持上述小手工业、小商业相关公益组织项目                                                                                                 |      |      |
| 409 | 如未从事，今后 1-2 年内是否有意愿从事小手工业或小商业经营                                                                                          |      |      |
| 410 | 如果愿意，是否希望获得小额贷款                                                                                                          |      |      |

## 5. 外出务工及收入

|     |                                                                                              | 2017 | 2018 |
|-----|----------------------------------------------------------------------------------------------|------|------|
| 501 | 你所在的村庄有多少比例家庭外出务工<br>(请根据所知情况填写百分比)                                                          |      |      |
| 502 | 你家近两年是否离开本县外出务工                                                                              |      |      |
| 503 | 家中外出务工的人数                                                                                    |      |      |
| 504 | 外出务工每人每年收入多少钱                                                                                |      |      |
|     | 外出务工期间每人每年开支多少成本<br>(如吃饭、购物、路费等)                                                             |      |      |
| 505 | 第一次外出务工的时间(哪一年)                                                                              |      |      |
| 506 | 连续外出务工多少年(年)                                                                                 |      |      |
| 507 | 外出务工主要在哪里打工<br>(1) 北京上海广州大城市; (2) 本省会城市; (3) 外省会城市; (4) 本省地级城市; (5) 外省地级城市; (6) 其他城市; (7) 国外 |      |      |
| 508 | 外出务工的机会是如何获得的<br>(1) 跟本村人一起外出, 老乡或亲戚推荐; (2) 本地政府组织招聘或推荐; (3) 自己外出应聘、闯荡; (4) 其他原因             |      |      |
| 509 | 家中是否有亲戚在外打工                                                                                  |      |      |
| 510 | 家中是否有亲戚是政府公务员                                                                                |      |      |
| 511 | 家中是否有亲戚是村干部                                                                                  |      |      |
| 512 | 家中是否有亲戚是党员                                                                                   |      |      |
