# Supplementary material
Source: Research Square preprint supplement (doi:10.21203/rs.3.rs-9113085/v1)
Supplement: Supplementary file 2 [file a0a19bd9d7c1fca518ce490b.pdf]

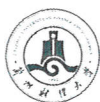

兰州财经大学  
Lanzhou University of Finance and Economics

## 兰州财经大学农林经济管理学院研究伦理审查表

伦理审查编号: ARE2019301

|                                                                                                                                                                               |                                                                                                                                                                                                                                                                                                                                                          |      |                                                                    |     |     |
|-------------------------------------------------------------------------------------------------------------------------------------------------------------------------------|----------------------------------------------------------------------------------------------------------------------------------------------------------------------------------------------------------------------------------------------------------------------------------------------------------------------------------------------------------|------|--------------------------------------------------------------------|-----|-----|
| 项目名称                                                                                                                                                                          | 西北民族地区社区及农户生计调查研究                                                                                                                                                                                                                                                                                                                                        |      |                                                                    |     |     |
| 承担专业                                                                                                                                                                          | 农林经济管理                                                                                                                                                                                                                                                                                                                                                   | 承担责任 | <input checked="" type="checkbox"/> 负责 <input type="checkbox"/> 参与 | 申请人 | 王龙魁 |
| 研究起止时间                                                                                                                                                                        | 2019.4~2020.3                                                                                                                                                                                                                                                                                                                                            |      |                                                                    |     |     |
| 研究类型                                                                                                                                                                          | <input type="checkbox"/> 各级自然科学基金项目 <input checked="" type="checkbox"/> 各级社会科学基金项目 <input type="checkbox"/> 其它                                                                                                                                                                                                                                           |      |                                                                    |     |     |
| 课题来源                                                                                                                                                                          | <input checked="" type="checkbox"/> 纵向 <input type="checkbox"/> 横向 <input type="checkbox"/> 其他                                                                                                                                                                                                                                                           |      |                                                                    |     |     |
| 所在系所                                                                                                                                                                          | 农林经济管理系                                                                                                                                                                                                                                                                                                                                                  |      |                                                                    |     |     |
| <p>项目详情: 本研究旨在调查甘肃、青海、宁夏等西北三省民族地区社区及农户生计状况, 在此基础上研究相关农业经济管理问题。研究将通过线下问卷的方式收集。所有受访者均自愿参与, 并在调查前已获得受访者的知情同意, 参与者在填写问卷过程中, 可随时退出。本研究仅涉及问卷数据收集, 不包含动物实验或人体组织的使用, 且数据将以匿名方式处理。</p> |                                                                                                                                                                                                                                                                                                                                                          |      |                                                                    |     |     |
| 审查结果                                                                                                                                                                          | <p>研究负责人的保证书:</p> <p>本人声明所填写内容属实, 并将严格按照申请书中有内容从事实验和研究。本人表示严格遵守国家法律有关规定, 同时保护受访者的健康、权益和隐私。本人有责任将研究中出现的问题如实向伦理委员会汇报, 并按照伦理委员会的要求改正。</p> <p style="text-align: right;">负责人签名: 王龙魁<br/>2019年3月15日</p>                                                                                                                                                       |      |                                                                    |     |     |
|                                                                                                                                                                               | <p>机构审查委员会意见:</p> <p>经学院学术委员会(审查委员会)评估, 本研究的设计与实施方案在科学性与公正性上均符合要求, 不会对参与者带来伤害或风险。参与者的招募遵循自愿参与和充分知情同意原则, 并严格保障其权益与隐私。研究内容不存在利益冲突, 也未违反相关伦理规范与法律规定。</p> <p>结论: 学院学术委员会(审查委员会)批准本研究按计划开展。</p> <p style="text-align: center;"><input checked="" type="checkbox"/>同意 <input type="checkbox"/>不同意</p> <p style="text-align: right;">签章: 张子斌<br/>2019年3月18日</p> |      |                                                                    |     |     |

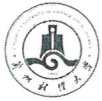

## Research Ethics Review Form

Ethics Review No. ARE2019301

|                                                                                                                                                                                                                                                                                                                                                                                                                                                                                                                                                                                                                                                                                                     |                                                                                                                                                                                                                                                                                                                                                                                                                                                                                                                                                                                                                                                                                                                                                                                                                                                                                                                |                             |                                                                                          |                  |              |
|-----------------------------------------------------------------------------------------------------------------------------------------------------------------------------------------------------------------------------------------------------------------------------------------------------------------------------------------------------------------------------------------------------------------------------------------------------------------------------------------------------------------------------------------------------------------------------------------------------------------------------------------------------------------------------------------------------|----------------------------------------------------------------------------------------------------------------------------------------------------------------------------------------------------------------------------------------------------------------------------------------------------------------------------------------------------------------------------------------------------------------------------------------------------------------------------------------------------------------------------------------------------------------------------------------------------------------------------------------------------------------------------------------------------------------------------------------------------------------------------------------------------------------------------------------------------------------------------------------------------------------|-----------------------------|------------------------------------------------------------------------------------------|------------------|--------------|
| <b>Project Title</b>                                                                                                                                                                                                                                                                                                                                                                                                                                                                                                                                                                                                                                                                                | Investigation on Livelihoods of Rural Households in Northwest Ethnic Regions                                                                                                                                                                                                                                                                                                                                                                                                                                                                                                                                                                                                                                                                                                                                                                                                                                   |                             |                                                                                          |                  |              |
| <b>Affiliated Discipline</b>                                                                                                                                                                                                                                                                                                                                                                                                                                                                                                                                                                                                                                                                        | Agriculture and Forestry Economic Management                                                                                                                                                                                                                                                                                                                                                                                                                                                                                                                                                                                                                                                                                                                                                                                                                                                                   | <b>Responsibility Taken</b> | <input checked="" type="checkbox"/> Responsible<br><input type="checkbox"/> Participates | <b>Applicant</b> | Longkui WANG |
| <b>Study Period (Consistent with Project Duration)</b>                                                                                                                                                                                                                                                                                                                                                                                                                                                                                                                                                                                                                                              | Research Period: Apr. 2019 – Mar. 2020                                                                                                                                                                                                                                                                                                                                                                                                                                                                                                                                                                                                                                                                                                                                                                                                                                                                         |                             |                                                                                          |                  |              |
| <b>Study Type</b>                                                                                                                                                                                                                                                                                                                                                                                                                                                                                                                                                                                                                                                                                   | <input type="checkbox"/> Natural Science Foundation Project<br><input checked="" type="checkbox"/> Social Science Fund Project <input type="checkbox"/> Other                                                                                                                                                                                                                                                                                                                                                                                                                                                                                                                                                                                                                                                                                                                                                  |                             |                                                                                          |                  |              |
| <b>Source of Funding</b>                                                                                                                                                                                                                                                                                                                                                                                                                                                                                                                                                                                                                                                                            | <input checked="" type="checkbox"/> Vertical (Government-funded) <input type="checkbox"/> Horizontal (Industry/Cooperative) <input type="checkbox"/> Other                                                                                                                                                                                                                                                                                                                                                                                                                                                                                                                                                                                                                                                                                                                                                     |                             |                                                                                          |                  |              |
| <b>Affiliated Unit</b>                                                                                                                                                                                                                                                                                                                                                                                                                                                                                                                                                                                                                                                                              | Department of Agriculture and Forestry Economic Management                                                                                                                                                                                                                                                                                                                                                                                                                                                                                                                                                                                                                                                                                                                                                                                                                                                     |                             |                                                                                          |                  |              |
| <p><b>Project Details:</b> This study aims to investigate the livelihood status of communities and rural households in the ethnic regions of three northwestern provinces: Gansu, Qinghai, and Ningxia. Based on this investigation, related issues in agricultural economic management will be examined. Data will be collected via offline questionnaires. All respondents participated voluntarily and provided informed consent prior to the survey; participants retained the right to withdraw at any time during the process. This study involved only questionnaire data collection, excluding animal experiments or the use of human tissues, and all data were processed anonymously.</p> |                                                                                                                                                                                                                                                                                                                                                                                                                                                                                                                                                                                                                                                                                                                                                                                                                                                                                                                |                             |                                                                                          |                  |              |
| <b>Review Result</b>                                                                                                                                                                                                                                                                                                                                                                                                                                                                                                                                                                                                                                                                                | <p><b>Principal Investigator's Guarantee:</b><br/>I hereby declare that the content filled herein is true and accurate, and I will strictly conduct the experiment and research in accordance with the application. I commit to strictly abide by relevant national laws and regulations, and at the same time, protect the health, rights, and privacy of the interviewees. I am responsible for truthfully reporting any issues arising during the research to the Ethics Committee and making corrections as required by the Ethics Committee.</p> <p style="text-align: right;"><i>王龙贵</i><br/>Signature of Principal Investigator: Longkui WANG<br/>Date (Year/Month/Day): 2019/3/15</p>                                                                                                                                                                                                                  |                             |                                                                                          |                  |              |
|                                                                                                                                                                                                                                                                                                                                                                                                                                                                                                                                                                                                                                                                                                     | <p><b>Institutional Review Board (IRB) Opinion:</b><br/>Following evaluation by the School's Institutional Review Board, the design and implementation plan of this study meet the requirements for both scientific merit and fairness, and will not cause harm or risk to the participants. The recruitment of participants adheres to the principles of voluntary participation and full informed consent, and their rights and privacy are strictly protected. The research content has no conflicts of interest and does not violate relevant ethical norms or legal regulations.<br/>Conclusion: The Institutional Review Board approves the commencement of this research as planned.</p> <p><input checked="" type="checkbox"/> Approved <input type="checkbox"/> Not Approved</p> <p style="text-align: right;"><i>张永刚</i><br/>Signature/Seal: Zhang Yonggang<br/>Date (Year/Month/Day): 2019/3/18</p> |                             |                                                                                          |                  |              |
