# Supplementary material
Source: Research Square preprint supplement (doi:10.21203/rs.3.rs-9113085/v1)
Supplement: Supplementary file 3 [file a64086f7bb01c80421a11d52.docx]

**Appendix**

| **Table A1**  Robustness Check: Party Member Control, Clustering Level of the Fixed Effects, and Robust Standard Errors (Dependent Variable: Self-Employment) | | | | | | | | | |
| --- | --- | --- | --- | --- | --- | --- | --- | --- | --- |
|  | (1) | (2) | (3) | (4) | (5) | (6) | (7) | (8) | (9) |
|  |  |  |  |  |  |  |  |  |  |
| Village Cadre Kinship | 0.610*** | 0.652*** | 0.987*** | 0.594*** | 0.637*** | 0.987*** | 0.595*** | 0.638*** | 0.986*** |
|  | (0.163) | (0.166) | (0.333) | (0.157) | (0.159) | (0.330) | (0.135) | (0.132) | (0.249) |
| Party Member Kinship | -0.066 | -0.064 | -0.052 |  |  |  |  |  |  |
|  | (0.086) | (0.086) | (0.081) |  |  |  |  |  |  |
| Religious Sites per 10k People | 0.069 |  |  | -0.204 |  |  | 0.056 |  |  |
|  | (0.076) |  |  | (0.710) |  |  | (0.066) |  |  |
| Religious Sites per 10k HHs |  | 0.012 |  |  | -0.017 |  |  | 0.010 |  |
|  |  | (0.012) |  |  | (0.073) |  |  | (0.011) |  |
| Proportion of Adherents |  |  | 0.001* |  |  | -0.000 |  |  | 0.001* |
|  |  |  | (0.001) |  |  | (0.005) |  |  | (0.001) |
| Religious Sites per 10k People × Village Cadre | -0.183** |  |  | -0.189** |  |  | -0.189** |  |  |
|  | (0.073) |  |  | (0.075) |  |  | (0.076) |  |  |
| Religious Sites per 10k HHs × Village Cadre |  | -0.043*** |  |  | -0.044*** |  |  | -0.044*** |  |
|  |  | (0.015) |  |  | (0.015) |  |  | (0.014) |  |
| Proportion of Adherents × Village Cadre |  |  | -0.009** |  |  | -0.009** |  |  | -0.009*** |
|  |  |  | (0.004) |  |  | (0.004) |  |  | (0.003) |
| HH Characteristics | Y | Y | Y | Y | Y | Y | Y | Y | Y |
| County FE | Y | Y | Y |  |  |  | Y | Y | Y |
| Township FE |  |  |  | Y | Y | Y |  |  |  |
| Observations | 1,214 | 1,214 | 1,214 | 1,214 | 1,214 | 1,214 | 1,214 | 1,214 | 1,214 |
| Pseudo R-squared | 0.0833 | 0.0835 | 0.0846 | 0.0835 | 0.0838 | 0.0850 | 0.0830 | 0.0833 | 0.0845 |
| *Notes*: Significance level: *p < 0.1, **p < 0.05, ***p < 0.01. | | | | | | | | | |

| **Table A2**  Robustness Check: Alternative Estimation Models (Dependent Variable: Self-Employment) | | | | | | | | | |
| --- | --- | --- | --- | --- | --- | --- | --- | --- | --- |
|  | (1) | (2) | (3) | (4) | (5) | (6) | (7) | (8) | (9) |
|  |  |  |  |  |  |  |  |  |  |
| Village Cadre Kinship | 0.989*** | 1.066*** | 1.690*** | 0.211*** | 0.227*** | 0.344** | 0.382*** | -0.155 | 0.029 |
|  | (0.258) | (0.261) | (0.573) | (0.054) | (0.055) | (0.108) | (0.118) | (0.165) | (0.083) |
| Religious Sites per 10k People | 0.088 |  |  | 0.015 |  |  |  |  |  |
|  | (0.127) |  |  | (0.025) |  |  |  |  |  |
| Religious Sites per 10k HHs |  | 0.016 |  |  | 0.003 |  |  |  |  |
|  |  | (0.020) |  |  | (0.004) |  |  |  |  |
| Proportion of Adherents |  |  | 0.002* |  |  | 0.000 |  |  |  |
|  |  |  | (0.001) |  |  | (0.000) |  |  |  |
| Religious Sites per 10k People × Village Cadre | -0.317*** |  |  | -0.065** |  |  |  |  |  |
|  | (0.121) |  |  | (0.025) |  |  |  |  |  |
| Religious Sites per 10k HHs × Village Cadre |  | -0.075*** |  |  | -0.015** |  |  |  |  |
|  |  | (0.025) |  |  | (0.005) |  |  |  |  |
| Proportion of Adherents × Village Cadre |  |  | -0.016** |  |  | -0.003** |  |  |  |
|  |  |  | (0.007) |  |  | (0.001) |  |  |  |
| HH Characteristics | Y | Y | Y | Y | Y | Y | Y | Y | Y |
| County FE | Y | Y | Y | Y | Y | Y | Y | Y | Y |
| Observations | 1,214 | 1,214 | 1,214 | 1,214 | 1,214 | 1,214 | 1,214 | | |
| Pseudo R-squared | 0.0828 | 0.0831 | 0.0845 | 0.105 | 0.106 | 0.107 |  |  |  |
| *Notes*: Columns (1)–(3) report results from Logit regressions, columns (4)–(6) from OLS regressions, and columns (7)–(9) from multivariate Probit regressions. The dependent variable in columns (1)–(7) is household participation in self-employment. In contrast, the dependent variable in column (8) is household participation in migrant work, and in column (9) is household participation in agriculture. Significance level: *p < 0.1, **p < 0.05, ***p < 0.01. | | | | | | | | | |

**Table A3**

Income Mean Differences Between Village Cadre and Non-Village Cadre Households

|  | Non-Village Cadre (A)  Mean | Village Cadre (B)  Mean | | Difference (A–B) | t-statistic |
| --- | --- | --- | --- | --- | --- |
| Self-Employment Income | 47641.071 | 55949.367 | -8308.296 | | -1.3 |

*Notes*: Significance level: *p < 0.1, **p < 0.05, ***p < 0.01.
